# Supplementary material
Source: Research Square preprint supplement (doi:10.21203/rs.3.rs-9460142/v1)
Supplement: Supplementary file 1 [file 8d9f7ebdf1dd612148bf40c9.xlsx]

## Sheet: Data
code	age	Age_cat3	gender	marital	residense	job	job.women	job.men	education	smoke	Adj.income_new	ajusted.income_cat	duration	duration_cat3	family.history	type.heart_6	type.heart	no.hospital	Reading	Access.information	Understanding	Appraisal	Decision	Total_HL	health.responsibility	eating.habits	physical.activity	smoking	Stress.management	HB_total	income	no.family	adjusted.income	HL1	HL2	HL3	HL4	HL5	HL6	HL7	HL8	HL9	HL10	HL11	HL12	HL13	HL14	HL15	HL16
1	38	2	1	2	1	2		2	2	1	4	4	3	2	1	1	1	1	43.75	33.3333	46.4286	37.5	50	43.9394	44.4444	53.3333	41.6667	33.3333	55.5556	46.0317	18	1	18	3	3	2	3	2	3	3	2	2	2	5	3	3	2	3	2
2	32	2	0	3	2	4	3		2	1	3	3	3	2	0	4	4	1	62.5	58.3333	57.1429	75	56.25	59.8485	55.5556	66.6667	33.3333	11.1111	55.5556	47.619	10	1	10	4	4	3	3	3	3	4	4	3	3	4	4	3	3	3	3
3	21	1	1	1	2	1		1	3	3	1	1	1	1	0	1	1	2	87.5	87.5	89.2857	93.75	89.5833	89.3939	72.2222	86.6667	8.33333	77.7778	33.3333	58.7302	2	2	1	5	5	4	4	4	4	5	5	5	4	5	5	4	5	4	5
4	44	2	1	2	1	2		2	2	2	3	3	4	2	1	2	2	3	68.75	62.5	67.8571	62.5	68.75	66.6667	55.5556	93.3333	50	77.7778	44.4444	65.0794	20	3	6.66667	4	4	4	3	3	3	4	4	4	3	4	4	3	4	4	4
5	33	2	0	1	2	2	2		4	3	4	4	5	2	1	3	3	3	100	100	100	93.75	83.3333	93.1818	94.4444	53.3333	41.6667	100	33.3333	66.6667	30	2	15	5	5	5	5	5	5	5	5	5	5	5	5	5	5	5	5
6	61	3	1	3	2	3		3	3	1	2	2	10	3	0	24	6	3	37.5	33.3333	50	62.5	31.25	40.1515	22.2222	53.3333	0	33.3333	22.2222	26.9841	17	3	5.66667	3	2	2	3	2	3	3	2	2	2	4	4	3	3	3	2
7	26	1	1	2	2	2		2	2	1	2	3	2	1	0	2	2	1	56.25	37.5	57.1429	62.5	45.8333	50	38.8889	33.3333	33.3333	22.2222	22.2222	31.746	12	2	6	3	4	3	3	2	4	3	2	2	2	5	4	3	3	3	3
8	21	1	1	1	2	1		1	3	1	1	1	0	1	1	5	5	1	75	83.3333	92.8571	43.75	35.4167	62.1212	16.6667	33.3333	50	33.3333	55.5556	34.9206	0	2	0	4	4	4	4	5	5	3	5	4	4	4	5	5	5	5	4
11	41	2	1	2	2	2		2	4	2	4	4	2	1	1	1	1	2	100	95.8333	85.7143	87.5	81.25	87.8788	61.1111	86.6667	33.3333	33.3333	77.7778	60.3175	37	2	18.5	5	5	5	5	5	5	5	5	5	4	5	5	4	4	5	4
12	20	1	0	2	1	4	3		3	3	1	1	1	1	1	2	2	1	68.75	79.1667	53.5714	56.25	54.1667	60.6061	44.4444	73.3333	8.33333	88.8889	11.1111	46.0317	0	1	0	4	4	4	3	4	5	5	4	4	3	4	3	3	3	4	3
13	40	2	0	2	2	2	2		3	3	3	3	0	1	0	5	5	1	81.25	87.5	85.7143	75	54.1667	72.7273	44.4444	60	33.3333	77.7778	44.4444	50.7937	13	2	6.5	4	4	4	5	5	5	4	4	4	5	4	5	4	5	4	5
14	38	2	1	2	2	2		2	4	1	3	3	1	1	1	5	5	1	100	75	67.8571	43.75	39.5833	59.8485	38.8889	53.3333	41.6667	44.4444	44.4444	44.4444	18	2	9	5	5	5	5	5	5	4	4	3	3	4	4	4	4	4	3
15	31	2	1	1	2	2		2	3	2	3	3	14	3	1	4	4	3	100	100	92.8571	87.5	89.5833	93.1818	83.3333	40	33.3333	88.8889	11.1111	53.9683	21	2	10.5	5	5	5	5	5	5	5	5	5	5	5	5	5	5	4	5
17	63	3	1	3	1	3		3	2	1	3	4	7	3	1	2	2	2	18.75	37.5	35.7143	6.25	25	26.5152	22.2222	73.3333	16.6667	22.2222	22.2222	33.3333	12	1	12	1	2	1	3	3	2	2	3	4	1	3	4	3	2	2	1
18	55	3	0	2	2	3	1		4	3	3	3	3	2	1	4	4	2	100	79.1667	82.1429	75	75	80.303	83.3333	80	75	100	66.6667	80.9524	18	2	9	5	5	5	5	5	5	4	4	4	3	5	5	5	5	4	3
19	41	2	1	2	1	2		2	2	1	3	3	3	2	0	1	1	1	37.5	62.5	35.7143	25	72.9167	53.0303	38.8889	46.6667	50	22.2222	44.4444	41.2698	20	2	10	2	2	3	3	3	4	4	3	3	4	3	3	2	3	2	2
20	58	3	1	2	2	3		3	3	1	4	4	6	3	1	1	1	2	50	45.8333	35.7143	18.75	47.9167	41.6667	38.8889	80	41.6667	33.3333	33.3333	47.619	14	1	14	3	3	2	4	4	3	2	3	2	3	3	3	3	2	1	2
22	32	2	0	2	2	4	3		3	3	1	1	3	2	1	5	5	1	87.5	41.6667	78.5714	81.25	68.75	69.697	50	73.3333	50	88.8889	66.6667	63.4921	0	3	0	4	4	5	5	4	5	3	2	1	1	5	4	5	4	4	4
23	46	3	0	2	2	2	2		4	3	4	4	3	2	1	2	2	2	100	70.8333	96.4286	87.5	68.75	81.0606	55.5556	86.6667	33.3333	100	44.4444	63.4921	26	2	13	5	5	5	5	5	5	4	3	4	2	5	5	5	5	5	5
24	19	1	0	1	2	1	1		3	2	1	1	0	1	0	4	4	1	100	50	64.2857	93.75	75	73.4848	61.1111	73.3333	50	77.7778	44.4444	61.9048	3	3	1	5	5	5	5	5	5	2	1	3	2	4	4	3	5	4	3
25	47	3	1	2	2	2		2	2	1	4	4	5	2	1	1	1	2	87.5	66.6667	57.1429	56.25	64.5833	65.1515	38.8889	53.3333	33.3333	44.4444	33.3333	41.2698	40	2	20	4	4	5	5	5	5	4	5	2	1	5	5	5	2	2	3
26	23	1	1	1	1	2		2	3	1	4	4	0	1	1	6	7	1	87.5	58.3333	82.1429	75	66.6667	71.9697	50	46.6667	58.3333	55.5556	55.5556	52.381	15	1	15	5	4	4	5	5	5	2	2	3	3	5	5	5	4	4	3
27	38	2	0	2	2	4	3		3	3	1	1	1.5	1	0	4	4	2	68.75	70.8333	75	81.25	60.4167	68.9394	50	60	33.3333	88.8889	55.5556	55.5556	0	2	0	4	4	3	4	3	3	5	4	4	4	4	4	4	4	5	4
28	61	3	0	3	1	3	1		2	3	4	4	13	3	1	4	4	2	56.25	45.8333	53.5714	68.75	68.75	59.8485	27.7778	73.3333	33.3333	88.8889	55.5556	52.381	23	1	23	3	2	4	4	3	5	2	3	3	1	4	2	1	4	3	5
29	42	2	1	2	2	2		2	4	1	2	2	4	2	1	1	1	2	100	100	100	100	68.75	88.6364	77.7778	60	41.6667	0	44.4444	50.7937	10	2	5	5	5	5	5	5	5	5	5	5	5	5	5	5	5	5	5
30	63	3	0	3	1	3	1		3	3	2	2	8	3	1	1	1	3	50	20.8333	10.7143	18.75	52.0833	33.3333	33.3333	93.3333	33.3333	88.8889	88.8889	63.4921	17	3	5.66667	2	3	4	3	3	3	2	1	1	1	2	2	1	1	1	2
31	39	2	1	2	2	2		2	4	1	4	4	2	1	0	5	5	2	87.5	62.5	50	93.75	64.5833	67.4242	44.4444	73.3333	58.3333	44.4444	77.7778	58.7302	35	1	35	5	5	4	4	5	5	4	3	2	2	4	3	2	3	4	3
32	36	2	1	2	2	2		2	4	1	4	4	0	1	1	3	3	1	75	75	53.5714	93.75	68.75	70.4545	61.1111	93.3333	50	44.4444	55.5556	63.4921	27	1	27	4	4	4	4	5	5	4	3	3	4	4	3	3	4	3	3
33	47	3	1	2	2	2		2	3	1	4	4	2	1	1	1	1	2	62.5	25	25	37.5	47.9167	39.3939	33.3333	86.6667	25	33.3333	22.2222	42.8571	40	2	20	3	4	4	3	4	3	2	1	1	1	3	2	1	3	2	2
34	51	3	1	2	2	3		3	2	3	4	4	2	1	1	6	7	1	75	41.6667	46.4286	56.25	66.6667	57.5758	55.5556	93.3333	75	100	44.4444	73.0159	50	2	25	5	4	3	4	3	4	3	2	2	2	4	4	2	2	4	2
35	30	2	0	3	2	4	3		3	3	4	4	1	1	1	5	5	2	100	58.3333	46.4286	87.5	68.75	68.1818	83.3333	100	100	100	100	95.2381	20	1	20	5	5	5	5	5	5	4	2	2	2	4	4	2	2	4	2
37	27	1	1	1	2	1		1	3	1	1	1	7	3	0	4	4	3	100	91.6667	100	75	100	95.4545	100	100	100	11.1111	100	87.3016	0	2	0	5	5	5	5	5	3	5	5	5	5	5	5	5	5	5	5
38	50	3	1	2	2	3		3	3	2	4	4	1	1	1	1	1	1	100	83.3333	64.2857	100	100	89.3939	100	100	100	100	100	100	50	2	25	5	5	5	5	5	5	4	4	4	4	4	4	4	4	3	3
40	40	2	1	2	1	2		2	4	1	2	2	40	3	1	34	6	3	100	75	57.1429	100	75	77.2727	77.7778	100	100	55.5556	66.6667	82.5397	10	2	5	5	5	5	5	5	5	4	4	3	3	5	5	2	2	5	2
41	21	1	1	1	2	1		1	4	1	2	2	5	2	1	23	6	2	62.5	45.8333	67.8571	62.5	66.6667	62.1212	55.5556	53.3333	16.6667	33.3333	44.4444	42.8571	10	2	5	4	4	3	3	4	3	2	2	3	3	3	4	4	4	4	3
42	41	2	0	2	2	4	3		3	3	1	1	1	1	1	1	1	1	81.25	50	42.8571	62.5	79.1667	64.3939	55.5556	93.3333	83.3333	88.8889	100	80.9524	0	2	0	4	4	4	5	4	5	4	2	2	1	4	3	2	3	2	3
43	34	2	1	2	2	2		2	4	1	4	4	1	1	1	5	5	2	100	66.6667	57.1429	75	81.25	75	44.4444	86.6667	50	33.3333	55.5556	55.5556	37	2	18.5	5	5	5	5	5	5	4	3	3	2	4	4	3	4	3	3
44	33	2	0	1	2	2	2		2	1	4	4	0	1	0	5	5	1	100	66.6667	71.4286	62.5	77.0833	75	66.6667	86.6667	75	66.6667	88.8889	76.1905	30	1	30	5	5	5	5	5	5	4	3	3	2	5	5	4	5	3	3
45	18	1	0	1	2	1	1		3	3	1	2	18	3	0	4	4	1	68.75	66.6667	75	81.25	79.1667	75	66.6667	80	75	88.8889	66.6667	74.6032	3	2	1.5	5	4	1	5	4	5	4	3	3	3	5	4	4	5	4	3
46	58	3	0	2	2	4	3		3	3	2	3	55	3	1	3	3	2	50	75	53.5714	75	79.1667	68.9394	77.7778	80	58.3333	100	44.4444	73.0159	12	2	6	4	3	2	3	5	5	2	4	4	4	4	4	3	2	5	2
47	63	3	1	2	1	3		3	2	2	4	4	6	3	0	1	1	2	25	37.5	32.1429	25	29.1667	30.303	22.2222	80	33.3333	11.1111	33.3333	38.0952	15	1	15	2	3	1	2	2	3	3	2	3	2	3	3	2	1	2	2
48	45	3	0	2	2	4	3		2	3	2	2	4	2	1	6	7	1	56.25	58.3333	53.5714	56.25	62.5	58.3333	55.5556	73.3333	50	88.8889	66.6667	65.0794	6	3	2	3	3	3	4	3	3	4	3	4	3	4	4	4	2	4	2
50	34	2	0	3	2	1	1		2	1	2	2	4	2	0	4	4	1	68.75	75	67.8571	62.5	54.1667	63.6364	33.3333	60	41.6667	44.4444	44.4444	44.4444	9	2	4.5	4	4	3	4	3	5	5	4	4	3	4	3	3	4	4	3
51	29	1	1	1	2	2		2	4	2	2	2	2	1	1	12	6	2	62.5	54.1667	75	68.75	56.25	62.1212	50	40	25	66.6667	55.5556	46.0317	15	3	5	4	3	4	3	2	4	4	4	3	2	5	4	4	2	5	4
52	33	2	0	2	1	4	3		3	3	2	2	6	3	0	1	1	2	43.75	66.6667	75	75	50	60.6061	38.8889	33.3333	41.6667	22.2222	55.5556	38.0952	10	2	5	3	3	2	3	4	4	4	3	4	3	5	4	3	4	3	4
53	35	2	1	1	2	2		2	2	1	3	3	31	3	1	23	6	3	100	66.6667	50	68.75	52.0833	62.1212	38.8889	66.6667	58.3333	44.4444	22.2222	47.619	9	1	9	5	5	5	5	5	5	3	3	3	3	4	4	2	3	3	2
54	35	2	1	2	1	2		2	2	1	3	3	7	3	1	5	5	2	50	37.5	50	37.5	50	46.2121	33.3333	33.3333	16.6667	33.3333	22.2222	28.5714	20	2	10	2	4	3	3	2	4	2	3	2	2	3	3	4	2	4	3
55	44	2	1	2	2	2		2	3	1	3	3	2	1	1	1	1	2	81.25	87.5	75	62.5	70.8333	75	55.5556	80	25	33.3333	44.4444	50.7937	17	2	8.5	4	4	5	4	5	5	4	4	4	5	5	4	3	4	3	5
56	32	2	1	1	2	2		2	3	1	3	4	32	3	1	3	3	3	93.75	83.3333	75	56.25	89.5833	81.8182	83.3333	73.3333	75	77.7778	44.4444	73.0159	12	1	12	5	4	5	5	5	5	4	4	4	4	5	5	4	4	4	3
57	32	2	0	1	1	4	3		3	3	1	1	2	1	0	1	1	1	43.75	37.5	42.8571	31.25	37.5	38.6364	38.8889	53.3333	25	88.8889	44.4444	47.619	0	3	0	4	3	2	2	2	3	3	3	2	2	3	3	3	3	3	2
58	35	2	0	3	2	4	3		3	3	1	1	1	1	1	4	4	1	37.5	41.6667	78.5714	37.5	43.75	49.2424	72.2222	66.6667	50	100	66.6667	69.8413	0	2	0	3	3	1	3	2	3	3	4	2	2	4	5	4	5	4	4
59	27	1	1	2	1	2		2	2	1	2	3	25	3	1	3	3	2	56.25	62.5	50	68.75	60.4167	59.0909	44.4444	53.3333	75	22.2222	33.3333	47.619	12	2	6	3	3	3	4	3	4	4	4	3	3	4	4	3	2	3	3
60	63	3	0	2	2	2	2		4	3	3	3	2.5	1	0	4	4	2	81.25	75	75	87.5	68.75	75	72.2222	93.3333	16.6667	100	33.3333	65.0794	21	2	10.5	5	4	4	4	4	3	5	4	4	4	5	4	4	4	4	4
61	64	3	1	2	1	3		3	4	2	2	2	12	3	1	2	2	2	62.5	75	60.7143	56.25	64.5833	64.3939	38.8889	53.3333	58.3333	33.3333	55.5556	47.619	12	3	4	4	3	4	3	4	4	4	4	4	4	3	3	3	3	4	4
62	30	2	0	3	1	2	2		3	2	4	4	2	1	0	2	2	1	62.5	58.3333	60.7143	62.5	60.4167	60.6061	50	53.3333	33.3333	66.6667	22.2222	46.0317	20	1	20	4	3	4	3	4	3	4	2	3	4	3	4	3	3	4	3
63	57	3	0	3	2	3	1		2	3	3	3	5	2	0	1	1	1	25	8.33333	10.7143	6.25	14.5833	12.8788	11.1111	86.6667	0	77.7778	88.8889	47.619	10	1	10	2	3	1	2	2	1	2	1	1	1	2	1	1	1	3	1
64	53	3	0	2	1	4	3		2	3	1	1	5	2	1	4	4	2	50	50	50	37.5	33.3333	42.4242	50	86.6667	0	100	77.7778	60.3175	0	3	0	3	3	3	3	3	3	3	3	3	3	3	3	3	3	3	3
66	54	3	1	3	2	2		2	4	1	4	4	4	2	1	5	5	2	68.75	66.6667	60.7143	56.25	62.5	62.8788	44.4444	40	66.6667	44.4444	55.5556	49.2063	50	1	50	4	3	4	4	3	4	4	3	4	4	4	3	4	3	4	3
67	40	2	0	2	2	4	3		3	3	1	1	3	2	0	6	7	1	56.25	70.8333	67.8571	68.75	56.25	62.8788	44.4444	73.3333	33.3333	88.8889	22.2222	52.381	0	2	0	4	3	3	3	4	4	4	4	4	3	4	4	4	3	4	4
68	29	1	1	2	2	2		2	3	2	3	4	3	2	1	12	6	2	68.75	75	82.1429	56.25	81.25	75.7576	61.1111	73.3333	66.6667	88.8889	22.2222	63.4921	12	1	12	4	4	3	4	4	5	4	4	4	3	4	5	4	4	5	4
69	23	1	1	1	1	2		2	2	3	2	2	3	2	1	3	3	2	37.5	50	57.1429	37.5	45.8333	46.9697	38.8889	53.3333	16.6667	88.8889	44.4444	46.0317	7	2	3.5	3	2	2	3	3	4	3	3	3	2	4	4	4	3	3	3
70	58	3	1	1	2	3		3	2	1	3	3	10	3	1	1	1	3	50	83.3333	71.4286	100	50	66.6667	33.3333	60	16.6667	22.2222	44.4444	36.5079	16	2	8	3	3	3	3	3	3	5	5	5	5	4	3	3	4	5	5
71	26	1	1	1	2	2		2	4	1	3	3	22	3	1	3	3	1	75	41.6667	82.1429	50	54.1667	59.8485	72.2222	53.3333	58.3333	33.3333	44.4444	55.5556	17	2	8.5	4	4	3	5	2	2	4	3	2	3	3	4	4	4	5	5
72	34	2	0	3	1	2	2		2	3	3	4	33	3	0	23	6	2	93.75	83.3333	85.7143	81.25	66.6667	78.7879	94.4444	100	83.3333	100	100	95.2381	12	1	12	5	5	5	4	5	5	4	4	4	4	5	5	5	4	4	4
73	43	2	0	2	2	4	3		3	3	2	2	5	2	1	6	7	1	75	66.6667	53.5714	50	43.75	54.5455	44.4444	73.3333	33.3333	33.3333	22.2222	44.4444	5	2	2.5	4	4	4	4	5	3	4	3	4	3	4	4	2	4	4	2
74	35	2	0	3	2	2	2		3	3	3	3	3	2	0	2	2	1	100	100	100	100	75	90.9091	66.6667	46.6667	50	100	100	68.254	7	1	7	5	5	5	5	5	5	5	5	5	5	5	5	5	5	5	5
75	34	2	1	1	2	2		2	3	2	3	3	5	2	0	2	2	3	56.25	66.6667	60.7143	75	70.8333	66.6667	61.1111	73.3333	58.3333	55.5556	22.2222	57.1429	15	2	7.5	4	4	3	2	3	3	5	4	4	3	4	3	4	3	4	3
76	24	1	0	1	2	1	1		4	3	1	1	0	1	0	4	4	1	100	45.8333	60.7143	87.5	77.0833	71.9697	72.2222	73.3333	75	88.8889	77.7778	76.1905	0	2	0	5	5	5	5	4	4	3	2	2	2	4	4	3	3	3	4
77	38	2	1	2	2	2		2	3	1	4	4	1	1	0	2	2	2	81.25	45.8333	35.7143	62.5	66.6667	57.5758	33.3333	60	33.3333	33.3333	55.5556	42.8571	25	1	25	4	4	5	4	5	5	2	2	2	1	4	2	2	4	2	2
78	43	2	1	2	2	2		2	3	1	4	4	2	1	1	1	1	2	56.25	37.5	46.4286	62.5	64.5833	54.5455	44.4444	73.3333	41.6667	44.4444	66.6667	53.9683	27	2	13.5	3	4	3	3	4	3	2	2	2	2	4	3	2	4	2	3
79	30	2	0	2	1	4	3		3	3	1	1	1	1	1	3	3	2	81.25	45.8333	53.5714	81.25	66.6667	63.6364	72.2222	86.6667	66.6667	77.7778	88.8889	77.7778	0	2	0	4	5	4	4	4	4	3	2	2	2	4	4	3	2	3	3
81	28	1	1	1	2	1		1	3	2	1	1	23	3	1	23	6	1	62.5	75	71.4286	62.5	60.4167	65.9091	50	53.3333	41.6667	77.7778	44.4444	52.381	3	3	1	3	3	4	4	4	4	5	4	4	3	4	4	4	4	4	3
82	19	1	0	1	2	1	1		3	1	1	1	0	1	0	5	5	1	100	100	96.4286	87.5	79.1667	90.1515	88.8889	46.6667	41.6667	66.6667	66.6667	63.4921	0	3	0	5	5	5	5	5	5	5	5	5	5	4	5	5	5	5	5
84	24	1	1	1	2	2		2	4	3	4	4	0	1	0	5	5	1	100	87.5	78.5714	93.75	70.8333	81.8182	27.7778	66.6667	83.3333	100	66.6667	63.4921	25	2	12.5	5	5	5	5	5	5	5	4	4	4	5	5	4	4	4	3
85	39	2	1	2	2	2		2	3	2	3	3	0	1	1	1	1	1	68.75	58.3333	60.7143	18.75	33.3333	46.2121	38.8889	60	8.33333	55.5556	44.4444	41.2698	20	3	6.66667	5	4	3	3	4	4	4	3	3	2	4	4	3	3	4	3
86	64	3	1	2	2	1		1	3	3	1	1	2	1	0	2	2	2	68.75	66.6667	57.1429	87.5	60.4167	65.1515	61.1111	40	33.3333	77.7778	33.3333	49.2063	0	2	0	4	4	4	3	3	3	5	4	4	3	4	4	3	3	4	3
87	32	2	1	1	2	2		2	4	1	4	4	0	1	1	4	4	2	93.75	100	100	56.25	66.6667	81.8182	77.7778	53.3333	58.3333	55.5556	55.5556	61.9048	25	2	12.5	5	5	4	5	5	5	5	5	5	5	5	5	5	5	5	5
91	21	1	1	1	2	2		2	4	3	1	1	0	1	0	5	5	1	100	91.6667	85.7143	56.25	50	71.9697	38.8889	40	50	88.8889	44.4444	49.2063	1	3	0.333333	5	5	5	5	5	5	5	3	5	5	5	3	4	5	5	4
92	23	1	0	1	2	1	1		3	3	1	1	3	2	0	4	4	2	100	83.3333	85.7143	87.5	64.5833	79.5455	72.2222	46.6667	41.6667	66.6667	22.2222	52.381	0	2	0	5	5	5	5	4	5	5	4	4	4	5	5	4	4	4	5
93	38	2	1	1	2	2		2	4	2	3	3	1	1	0	5	5	1	81.25	83.3333	82.1429	87.5	58.3333	74.2424	66.6667	20	25	66.6667	44.4444	44.4444	21	2	10.5	4	4	4	5	4	4	5	5	4	4	5	5	4	5	4	4
94	60	3	0	3	2	4	3		2	2	3	3	3	2	0	5	5	1	43.75	33.3333	35.7143	31.25	43.75	38.6364	38.8889	73.3333	41.6667	77.7778	44.4444	53.9683	13	2	6.5	2	3	2	4	3	3	2	2	2	2	3	2	3	2	3	2
96	45	3	0	2	1	4	3		3	2	2	2	3	2	1	1	1	2	43.75	54.1667	64.2857	56.25	50	53.7879	44.4444	80	33.3333	100	33.3333	57.1429	5	3	1.66667	3	3	2	3	3	4	3	3	3	3	4	4	3	4	5	3
97	55	3	1	2	2	2		2	4	1	3	3	2	1	0	6	7	1	75	70.8333	85.7143	56.25	47.9167	64.3939	55.5556	53.3333	8.33333	22.2222	11.1111	34.9206	20	3	6.66667	4	4	4	4	3	5	4	3	4	4	4	4	4	5	5	5
98	48	3	0	2	2	4	3		3	3	2	2	1	1	0	5	5	1	87.5	87.5	89.2857	37.5	89.5833	82.5758	72.2222	80	41.6667	100	55.5556	69.8413	10	2	5	4	5	4	5	5	5	4	4	5	4	4	5	4	5	5	5
99	49	3	0	2	1	4	3		2	3	1	1	0	1	0	6	7	1	50	45.8333	67.8571	50	58.3333	56.0606	44.4444	66.6667	58.3333	100	44.4444	60.3175	0	3	0	3	3	3	3	3	4	3	2	3	2	4	4	3	3	5	4
100	22	1	0	1	2	2	2		4	3	3	3	14	3	0	4	4	2	93.75	100	100	62.5	68.75	83.3333	88.8889	80	41.6667	100	55.5556	74.6032	14	2	7	4	5	5	5	5	5	5	5	5	5	5	5	5	5	5	5
101	60	3	1	2	1	3		3	3	2	2	2	12	3	0	1	1	2	50	62.5	67.8571	50	64.5833	61.3636	50	73.3333	50	100	22.2222	58.7302	12	3	4	3	4	2	3	4	5	3	3	4	2	4	3	4	5	4	2
102	24	1	1	1	2	2		2	4	1	1	1	1	1	1	5	5	1	75	87.5	89.2857	81.25	47.9167	71.2121	72.2222	53.3333	33.3333	44.4444	44.4444	52.381	2	2	1	4	4	4	4	5	5	4	4	5	4	3	5	5	5	5	4
103	41	2	0	2	2	4	3		2	3	1	1	3	2	1	4	4	1	31.25	50	46.4286	50	47.9167	46.2121	33.3333	86.6667	33.3333	100	22.2222	53.9683	0	2	0	2	3	2	2	3	5	2	2	3	3	4	3	3	4	3	1
104	62	3	1	3	1	3		3	3	2	3	3	18	3	0	1	1	2	68.75	41.6667	67.8571	62.5	60.4167	59.8485	44.4444	86.6667	8.33333	88.8889	55.5556	55.5556	7	1	7	3	4	4	4	3	4	1	3	3	2	5	3	3	4	4	4
106	22	1	1	2	2	2		2	2	1	4	4	21	3	0	3	3	3	56.25	45.8333	71.4286	75	54.1667	59.0909	50	33.3333	8.33333	22.2222	22.2222	30.1587	20	1	20	4	3	3	3	2	3	4	3	3	2	5	5	3	4	4	4
107	22	1	1	1	2	1		1	4	3	1	1	0	1	0	6	7	1	81.25	70.8333	75	81.25	60.4167	70.4545	66.6667	86.6667	41.6667	77.7778	55.5556	66.6667	2	2	1	4	5	4	4	3	5	4	4	4	3	4	4	3	5	5	4
108	25	1	1	1	2	1		1	4	3	1	1	3	2	0	6	7	1	75	87.5	96.4286	81.25	66.6667	79.5455	83.3333	46.6667	25	77.7778	22.2222	53.9683	0	2	0	4	5	4	3	4	5	4	5	5	4	5	5	5	5	5	5
109	19	1	1	1	1	1		1	2	3	1	1	1.5	1	1	23	6	2	25	41.6667	46.4286	43.75	22.9167	34.0909	22.2222	33.3333	16.6667	0	55.5556	25.3968	2	3	0.666667	2	2	1	3	4	3	2	1	3	3	2	3	3	4	3	3
110	31	2	0	2	2	2	2		3	1	2	3	1	1	0	5	5	1	81.25	100	100	100	100	97.7273	66.6667	100	33.3333	100	44.4444	69.8413	12	2	6	4	4	4	5	5	5	5	5	5	5	5	5	5	5	5	5
111	40	2	1	2	2	2		2	2	3	2	2	1	1	0	1	1	1	68.75	58.3333	67.8571	75	72.9167	68.9394	77.7778	60	33.3333	44.4444	88.8889	61.9048	12	3	4	4	4	4	3	3	4	4	3	3	3	4	4	4	4	4	3
112	35	2	1	2	2	2		2	4	3	4	4	2	1	0	4	4	2	68.75	75	89.2857	62.5	68.75	73.4848	55.5556	60	33.3333	77.7778	55.5556	55.5556	30	2	15	4	4	3	4	3	4	4	5	4	4	5	5	4	5	5	4
113	58	3	0	2	2	4	3		3	3	1	1	3	2	1	5	5	2	68.75	79.1667	78.5714	62.5	62.5	69.697	55.5556	53.3333	50	100	44.4444	58.7302	0	3	0	4	3	4	4	3	4	5	4	4	5	4	4	5	5	4	4
114	34	2	1	2	2	2		2	3	3	4	4	10	3	1	5	5	1	75	70.8333	78.5714	75	66.6667	71.9697	61.1111	73.3333	41.6667	77.7778	22.2222	57.1429	35	2	17.5	4	4	4	4	4	4	3	4	4	4	4	4	4	5	4	4
115	19	1	1	1	2	1		1	3	3	1	1	1	1	1	6	7	1	56.25	62.5	60.7143	68.75	77.0833	67.4242	72.2222	73.3333	58.3333	100	33.3333	68.254	0	2	0	3	4	3	3	2	4	3	4	4	4	5	4	3	4	4	2
116	57	3	0	2	1	4	3		2	3	2	2	4	2	0	2	2	2	50	58.3333	64.2857	12.5	60.4167	53.7879	27.7778	80	25	88.8889	22.2222	47.619	10	3	3.33333	3	3	3	3	4	5	3	3	3	2	3	4	3	4	5	4
117	29	1	1	1	2	2		2	4	2	3	3	26	3	1	3	3	3	68.75	66.6667	71.4286	56.25	56.25	62.8788	50	46.6667	41.6667	77.7778	44.4444	50.7937	15	2	7.5	4	4	3	4	4	3	4	4	3	4	4	4	3	4	5	3
118	35	2	0	1	2	1	1		4	3	4	4	2	1	0	24	6	2	81.25	66.6667	75	56.25	75	71.9697	66.6667	86.6667	33.3333	100	55.5556	68.254	15	1	15	5	4	4	4	3	4	4	4	4	3	4	4	3	4	5	4
119	52	3	0	2	2	4	3		2	3	1	1	7	3	0	1	1	1	25	20.8333	17.8571	12.5	50	30.303	11.1111	80	25	77.7778	77.7778	49.2063	0	1	0	2	2	2	2	2	3	2	1	1	2	3	3	1	1	2	1
120	27	1	1	2	1	2		2	2	1	3	3	2	1	1	4	4	2	56.25	62.5	46.4286	18.75	22.9167	38.6364	22.2222	20	0	22.2222	0	14.2857	8	1	8	3	3	3	4	3	4	4	4	3	3	4	3	3	3	3	2
121	44	2	0	3	2	2	2		4	3	4	4	2	1	1	5	5	2	100	95.8333	96.4286	81.25	87.5	91.6667	72.2222	86.6667	25	88.8889	55.5556	66.6667	30	1	30	5	5	5	5	5	5	5	5	4	5	5	5	4	5	5	5
122	48	3	0	2	1	4	3		2	3	1	1	10	3	1	2	2	3	37.5	41.6667	46.4286	37.5	37.5	40.1515	22.2222	80	0	100	44.4444	46.0317	0	2	0	2	3	2	3	3	4	3	2	2	2	4	4	2	3	3	2
123	26	1	0	1	2	2	2		3	3	2	3	2	1	0	6	7	1	81.25	83.3333	82.1429	56.25	87.5	81.0606	77.7778	73.3333	91.6667	88.8889	77.7778	80.9524	12	2	6	4	4	5	4	3	4	5	5	5	4	5	4	4	4	5	4
124	37	2	1	1	2	2		2	4	1	3	3	1	1	1	5	5	1	75	91.6667	100	56.25	52.0833	72.7273	55.5556	40	58.3333	44.4444	66.6667	52.381	17	2	8.5	4	4	3	5	4	4	5	5	5	5	5	5	5	5	5	5
127	29	1	1	1	2	2		2	3	3	2	2	4	2	1	6	7	2	62.5	75	67.8571	62.5	79.1667	71.9697	66.6667	100	100	88.8889	66.6667	84.127	11	2	5.5	3	4	4	3	3	5	4	4	4	4	5	3	3	4	4	4
128	65	3	1	2	2	3		3	2	1	2	2	10	3	0	1	1	3	0	0	10.7143	31.25	54.1667	25.7576	16.6667	100	25	55.5556	66.6667	50.7937	8	3	2.66667	1	1	1	1	1	1	1	1	1	1	2	2	1	1	1	2
129	25	1	1	1	2	2		2	4	1	3	3	0	1	0	6	7	1	87.5	100	100	81.25	52.0833	78.7879	55.5556	46.6667	50	55.5556	44.4444	50.7937	19	3	6.33333	5	4	4	5	5	5	5	5	5	5	5	5	5	5	5	5
131	62	3	0	2	2	3	1		4	3	2	2	4	2	0	2	2	3	81.25	100	100	81.25	89.5833	91.6667	83.3333	93.3333	41.6667	100	44.4444	74.6032	14	3	4.66667	4	4	5	4	5	5	5	5	5	5	5	5	5	5	5	5
132	34	2	1	2	2	2		2	2	1	2	2	7	3	1	5	5	1	31.25	12.5	46.4286	25	31.25	30.303	11.1111	66.6667	25	22.2222	33.3333	31.746	10	2	5	2	3	2	2	2	3	1	1	1	1	4	3	2	3	4	2
134	60	3	1	3	2	3		3	4	2	3	3	2	1	1	1	1	2	81.25	100	96.4286	75	77.0833	85.6061	66.6667	53.3333	33.3333	88.8889	44.4444	57.1429	15	2	7.5	4	5	4	4	5	5	5	5	5	5	5	5	5	5	5	5
135	26	1	1	1	1	1		1	2	1	1	2	0	1	0	6	7	1	31.25	33.3333	46.4286	37.5	29.1667	34.8485	22.2222	26.6667	8.33333	66.6667	55.5556	31.746	3	2	1.5	2	3	2	2	2	4	2	2	2	2	4	3	2	3	3	3
136	18	1	1	1	1	1		1	2	3	1	1	5	2	1	3	3	3	62.5	33.3333	64.2857	43.75	81.25	62.1212	66.6667	86.6667	33.3333	100	88.8889	73.0159	0	2	0	3	4	3	4	2	4	2	2	2	2	5	4	2	4	4	3
137	20	1	1	1	2	1		1	3	3	2	2	12	3	1	3	3	3	68.75	70.8333	60.7143	68.75	62.5	65.1515	61.1111	26.6667	16.6667	66.6667	77.7778	47.619	10	2	5	3	4	4	4	4	3	4	4	4	4	4	4	2	4	4	3
138	52	3	1	2	2	3		3	4	1	2	3	10	3	1	6	7	3	62.5	75	57.1429	56.25	62.5	62.8788	50	53.3333	50	33.3333	55.5556	49.2063	18	3	6	4	4	3	3	4	4	4	4	4	4	4	3	3	2	4	3
140	28	1	0	3	2	2	2		2	2	4	4	6	3	1	5	5	1	50	62.5	57.1429	75	52.0833	57.5758	50	33.3333	41.6667	44.4444	44.4444	42.8571	20	1	20	3	2	3	4	2	3	4	3	4	5	4	3	3	4	3	3
141	23	1	1	1	1	2		2	4	1	2	3	17	3	0	3	3	1	56.25	62.5	28.5714	50	39.5833	44.697	33.3333	46.6667	58.3333	44.4444	44.4444	44.4444	12	2	6	4	4	3	2	4	3	5	4	2	3	2	2	2	2	3	2
142	29	1	0	1	2	2	2		4	3	2	2	2	1	1	5	5	1	100	100	96.4286	81.25	89.5833	93.1818	77.7778	66.6667	50	100	66.6667	71.4286	16	3	5.33333	5	5	5	5	5	5	5	5	5	5	5	5	4	5	5	5
143	56	3	0	2	2	4	3		4	3	2	2	4	2	0	1	1	2	87.5	100	100	50	91.6667	89.3939	83.3333	80	50	100	88.8889	79.3651	10	3	3.33333	4	5	4	5	5	5	5	5	5	5	5	5	5	5	5	5
144	19	1	1	1	1	2		2	3	2	2	2	1	1	1	4	4	1	68.75	79.1667	89.2857	43.75	43.75	62.8788	38.8889	46.6667	66.6667	44.4444	44.4444	47.619	12	3	4	4	4	3	4	4	5	4	4	4	4	4	5	4	5	5	5
145	49	3	1	2	2	2		2	3	2	3	3	5	2	1	12	6	3	62.5	58.3333	78.5714	56.25	81.25	71.2121	44.4444	93.3333	8.33333	77.7778	44.4444	53.9683	18	2	9	4	3	3	4	4	4	3	3	3	3	4	4	3	4	5	5
146	49	3	0	2	1	4	3		3	3	2	2	2	1	1	1	1	2	62.5	58.3333	57.1429	31.25	43.75	50	44.4444	66.6667	50	77.7778	44.4444	55.5556	6	3	2	3	4	3	4	4	4	3	3	3	3	4	3	3	3	4	3
[truncated: 44 more columns]
